# Supplementary material
Source: PubMed Central journal article supplement (PMC6766970)

## Identification of metabolites

### General notes:

- Chromatograms and spectra are from representative study samples and pure chemical standards when available. All chemical standards were from IROA Technologies' Mass Spectrometry Metabolite Library (MSMLS)
- Chromatograms and isotope patterns: Find Compounds by Formula searches in Agilent MassHunter Qualitative Analysis B.06.00 SP1
- Isotope patterns: Red rectangles represent an isotope pattern calculated from the elemental composition (shown in the title of each spectra) , bars inside the rectangles show the observed isotope peaks
- MS/MS spectra: Precursor is indicated with a blue dot above the ion. Collision energy is on top of the spectra, e.g. CID@20.0.

### Table of contents

**Page 1:** 1-Methylnicotinamide, Taurine

**Page 2:** Valine

**Page 3:** Hypoxanthine, Leucine

**Page 4:** LysoPC(16:1)

**Page 5:** LysoPC(15:0), LysoPE(22:6)

**Page 6:** LysoPE(20:4), LysoPC(16:0) isomer

**Page 7:** LysoPC(16:0), LysoPC(P-16:0)

**Page 8:** LysoPC(17:0), LysoPC(18:0)

**Page 9:** Bilirubin

# 1-Methylnicotinamide

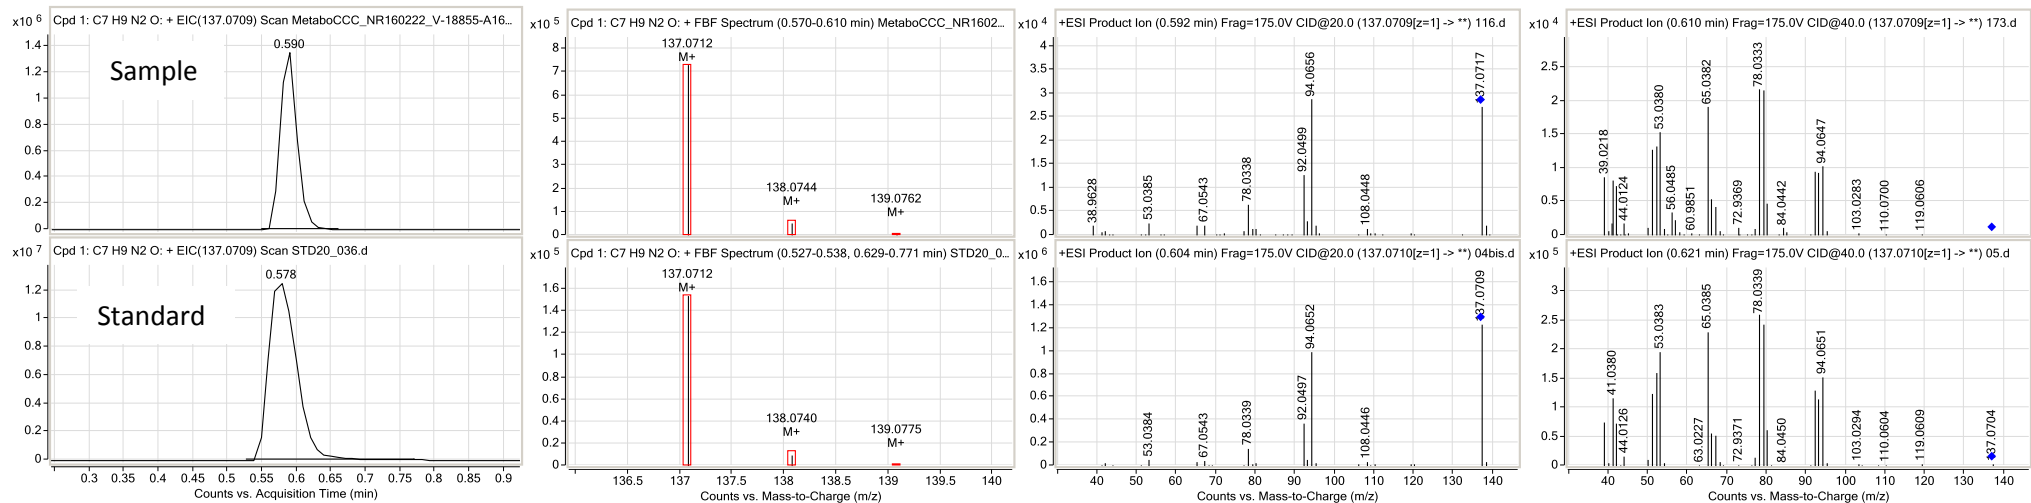

# Taurine

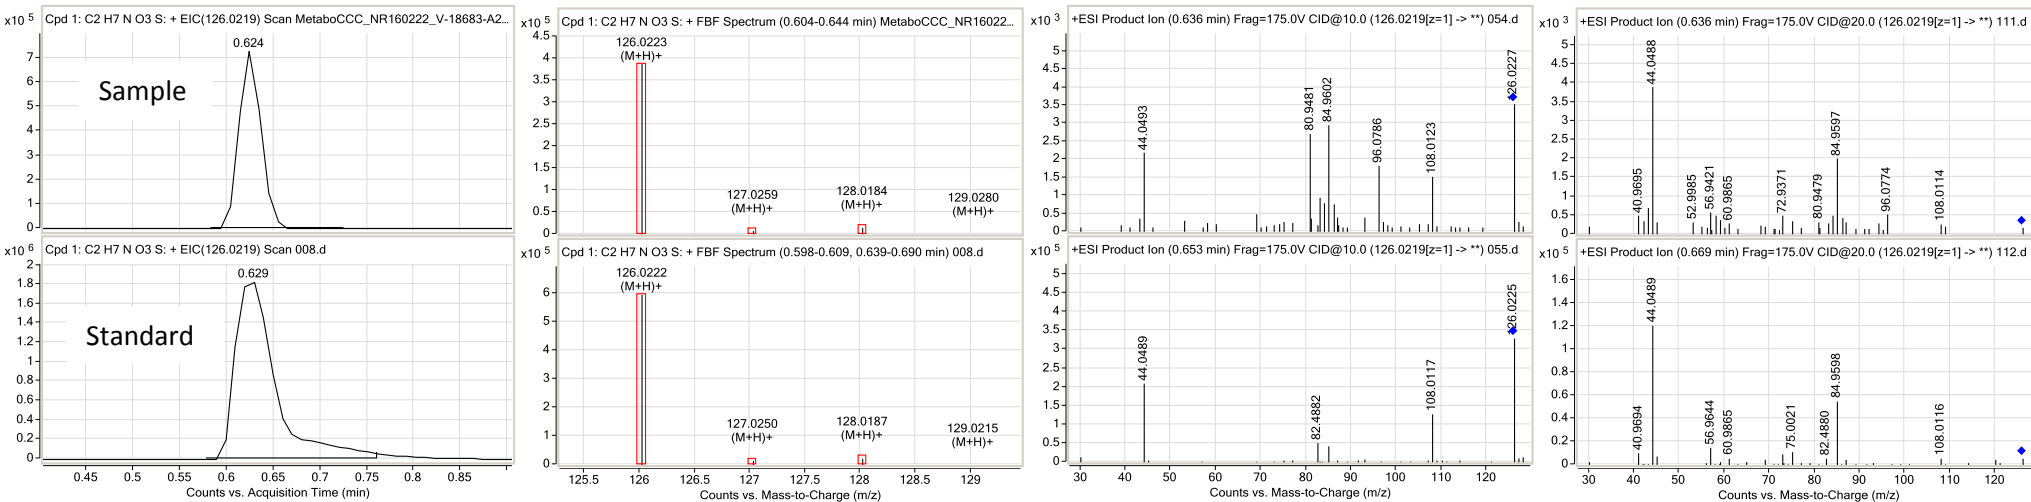

# Valine

Valine was found as  $[M+Na]^+$  due to saturation of the principal ion  $[M+H]^+$ . MS/MS spectra acquired from  $[M+H]^+$

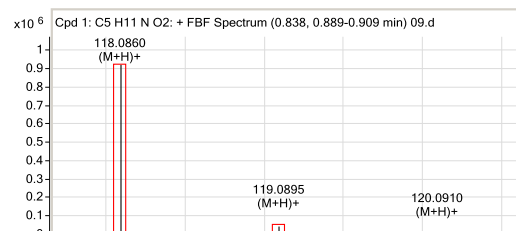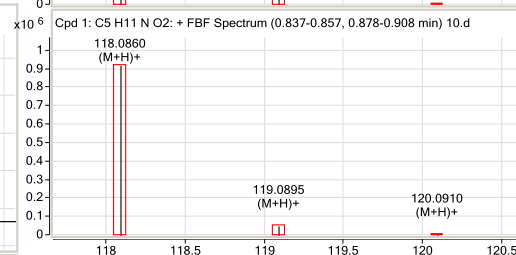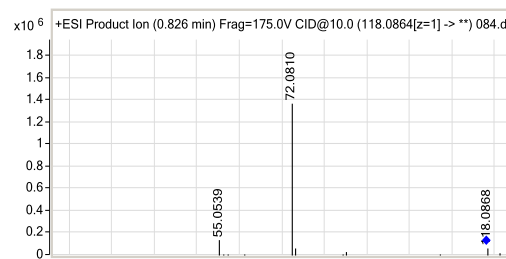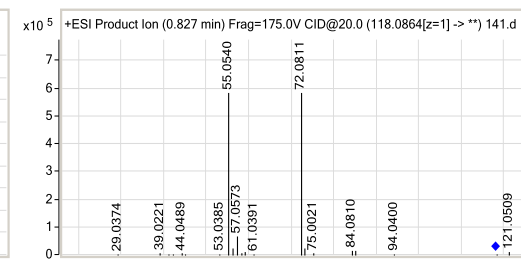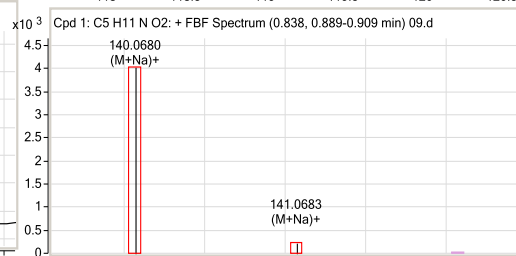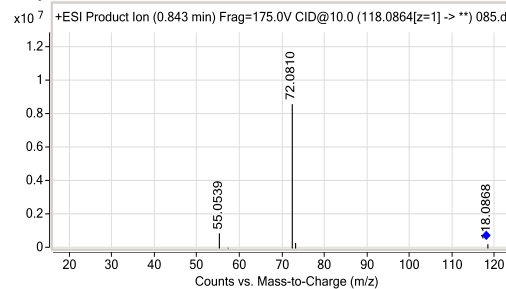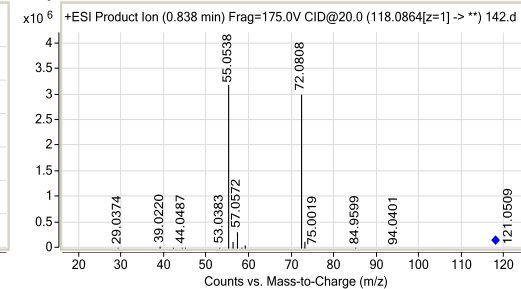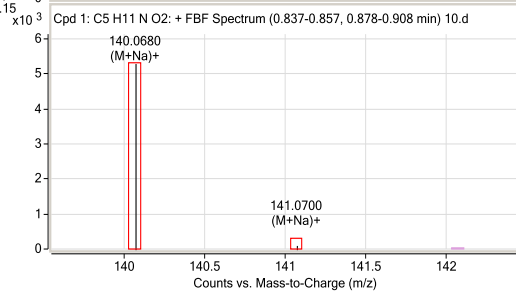

## Hypoxanthine

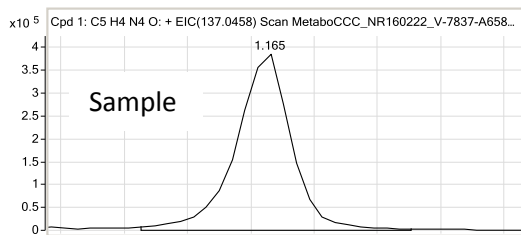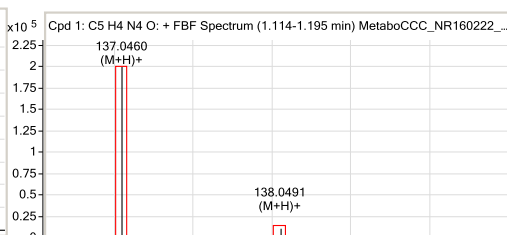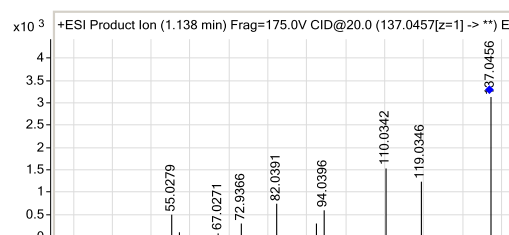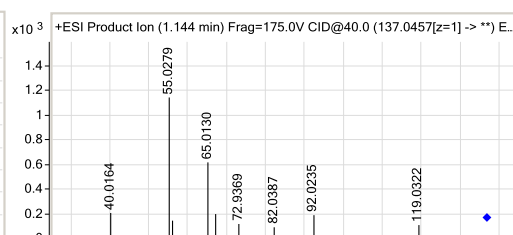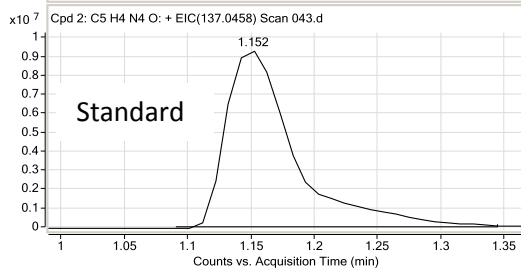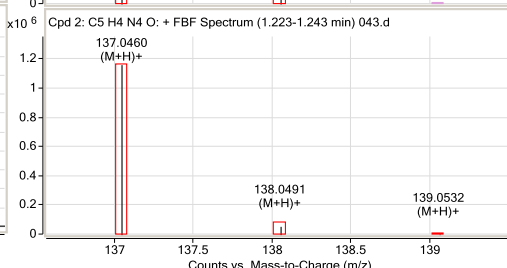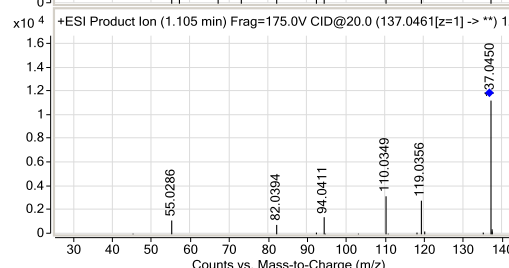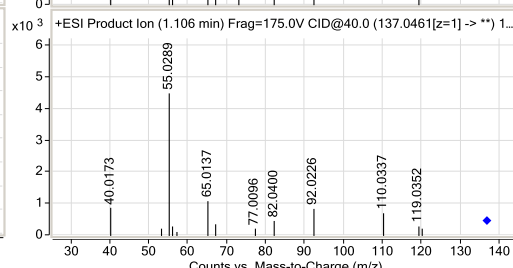

## Leucine

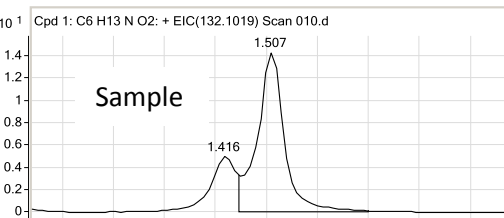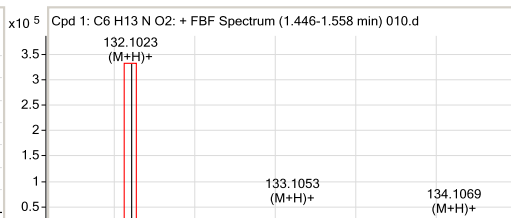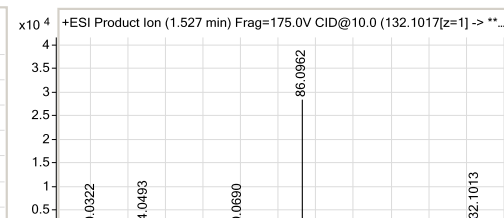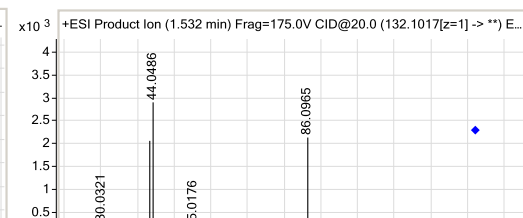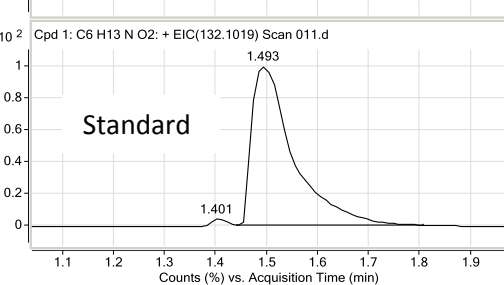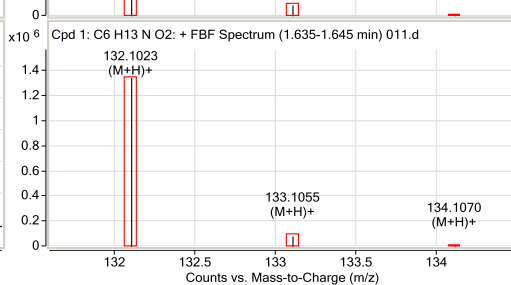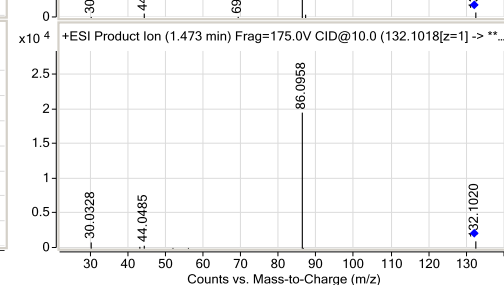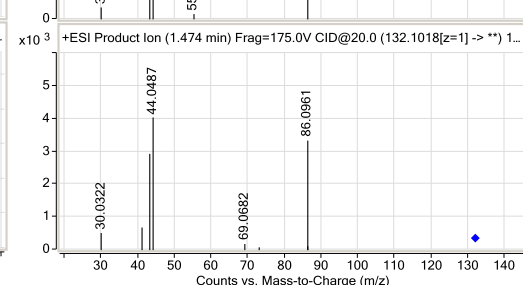

# LysoPC(16:1)

LysoPC(16:1) found as  $[M+H+K]^{2+}$ . MS/MS was acquired from  $[M+H]^+$

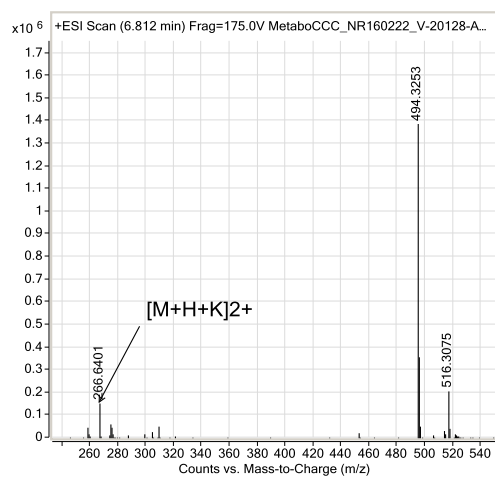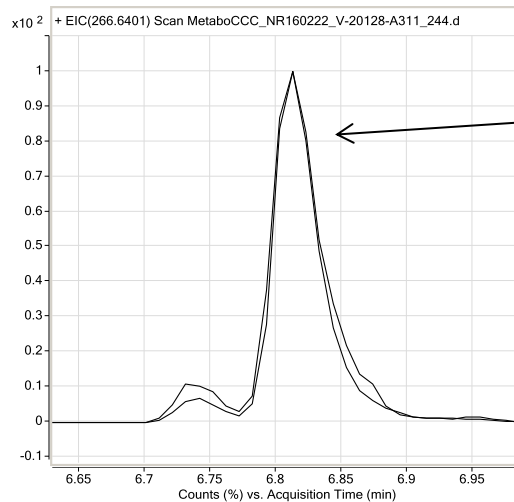

Overlaid chromatograms of  $[M+H+K]^{2+}$  and  $[M+H]^+$

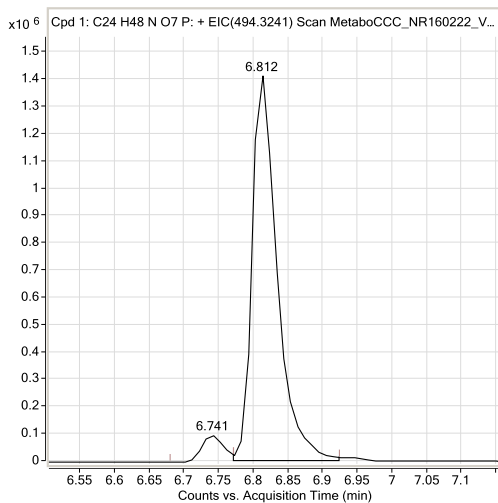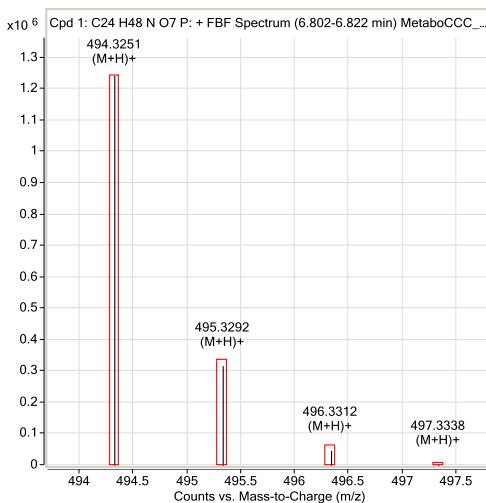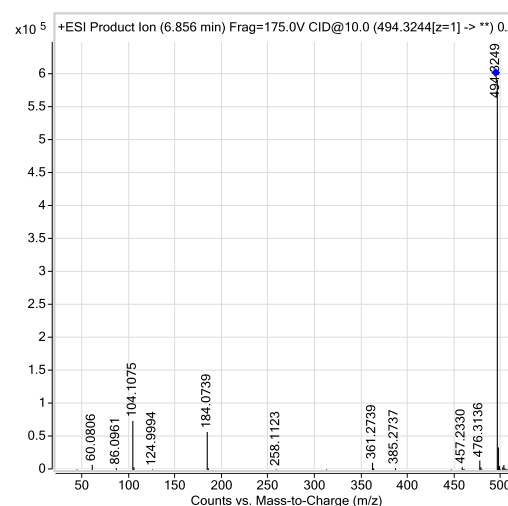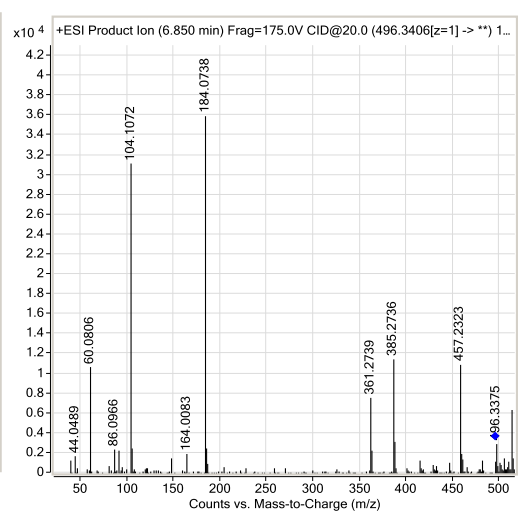

## LysoPC(15:0)

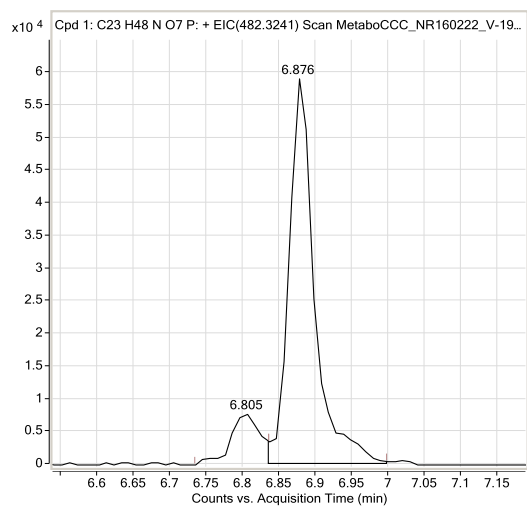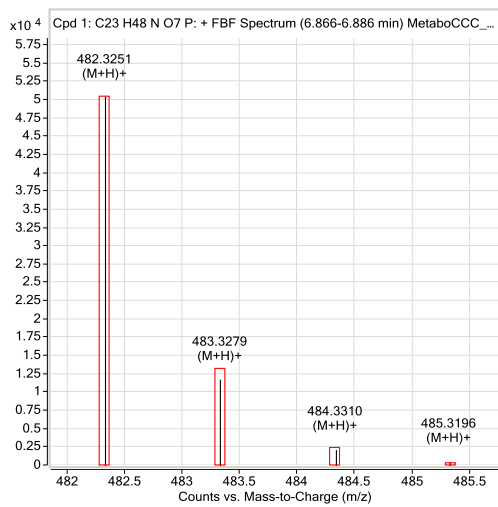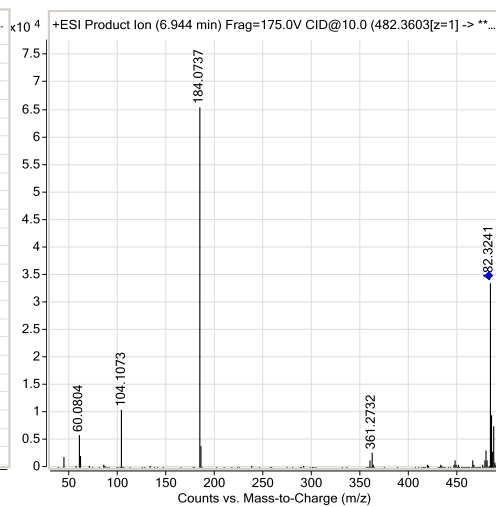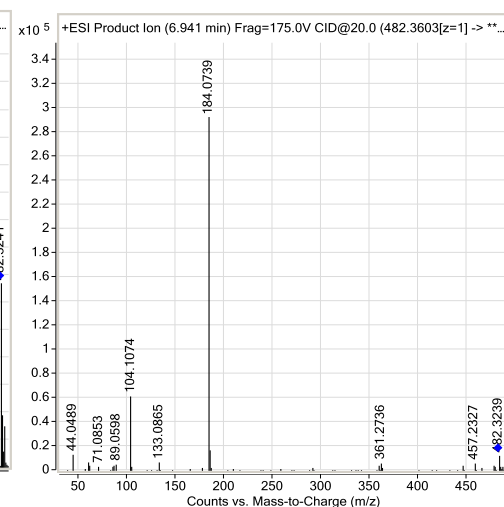

## LysoPE(22:6)

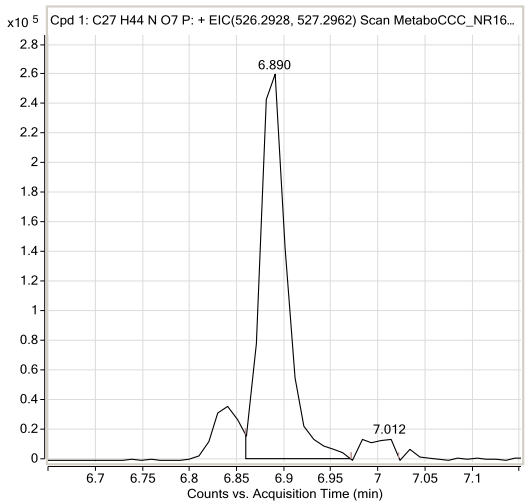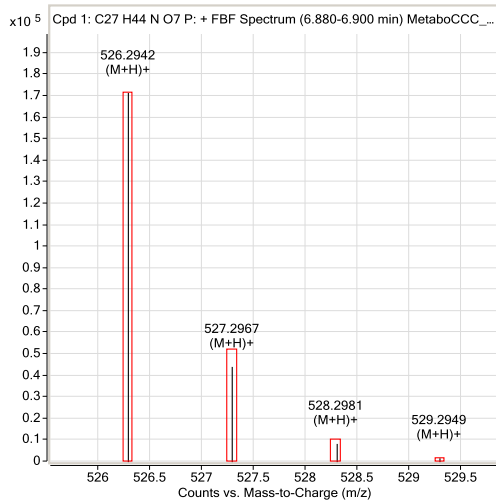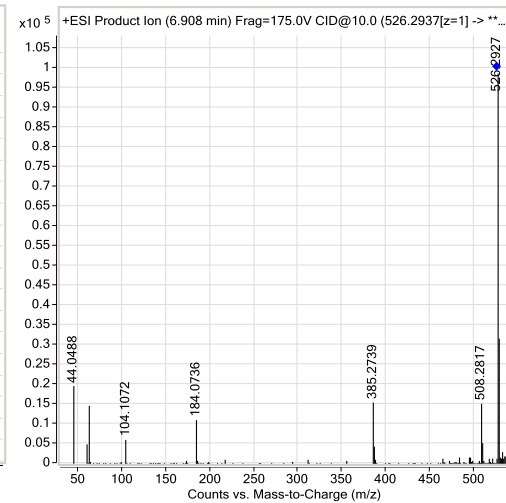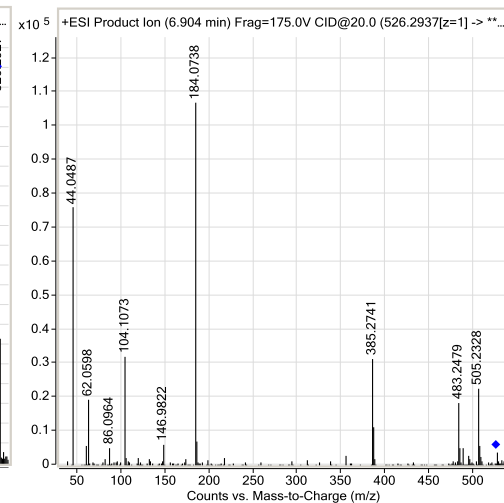

## LysoPE(20:4)

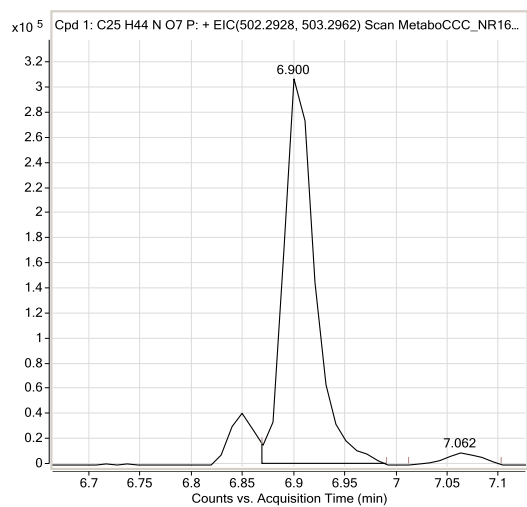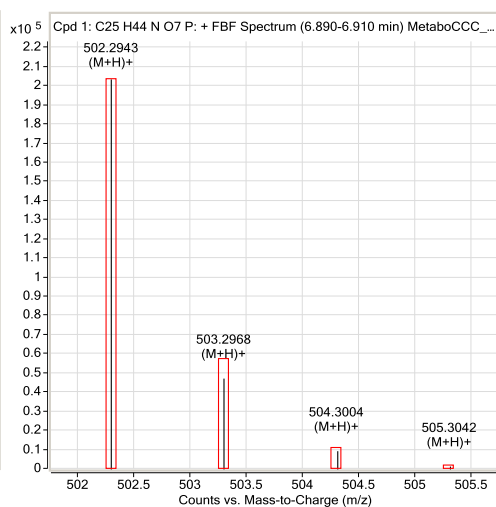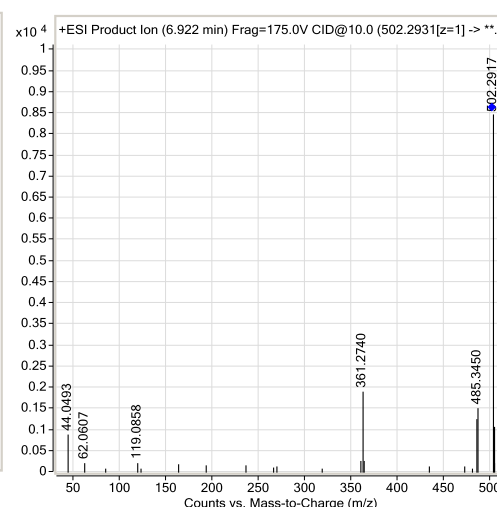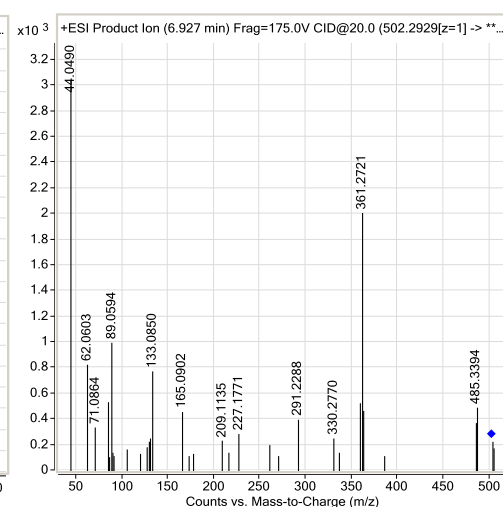

## LysoPC(16:0) isomer

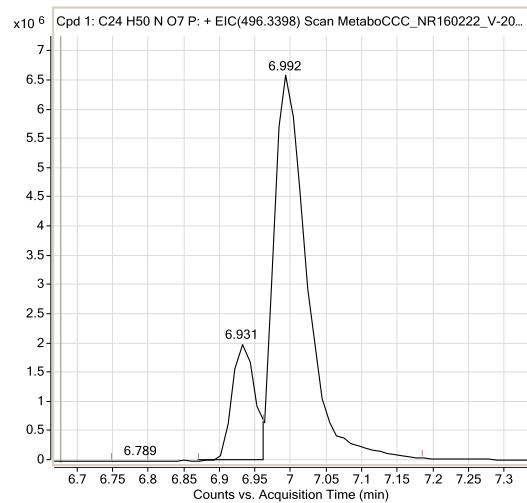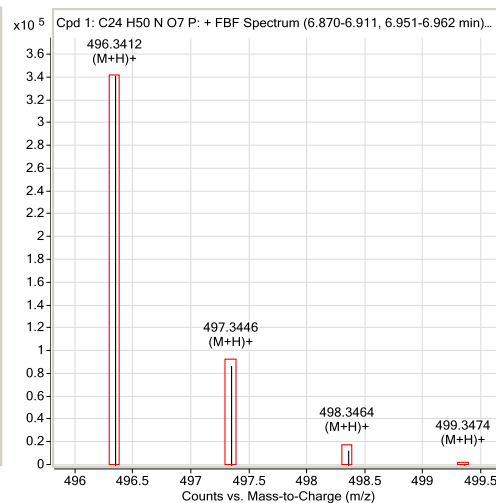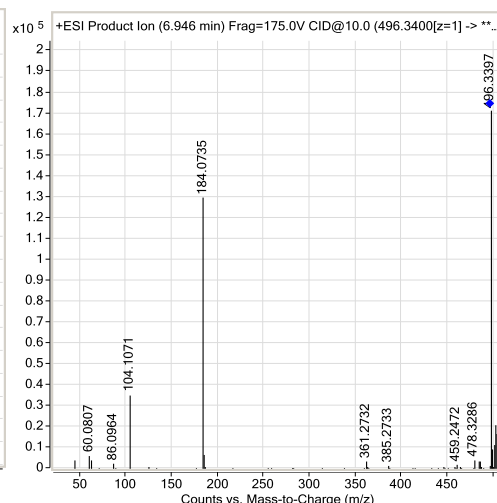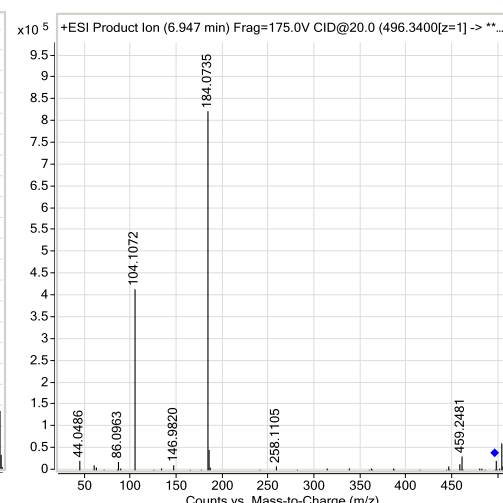

## LysoPC(16:0)

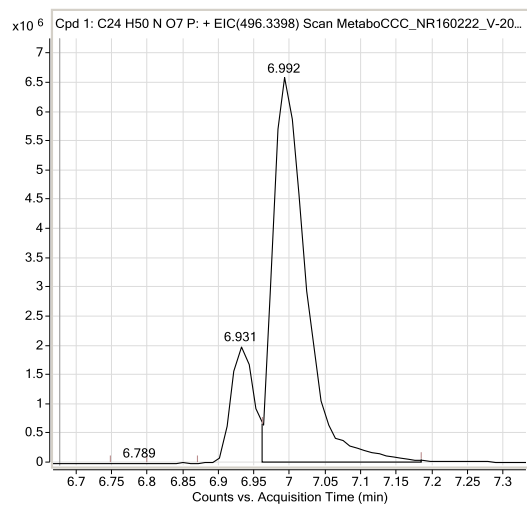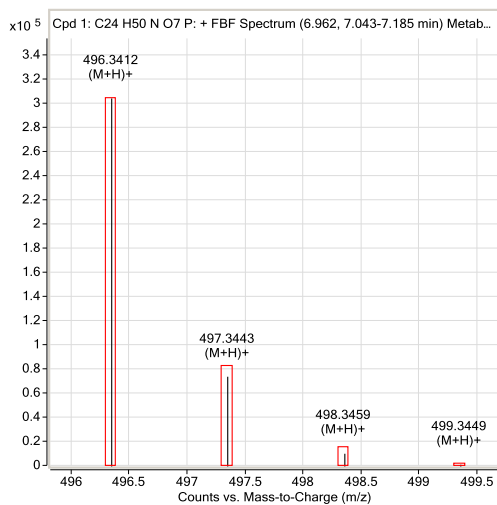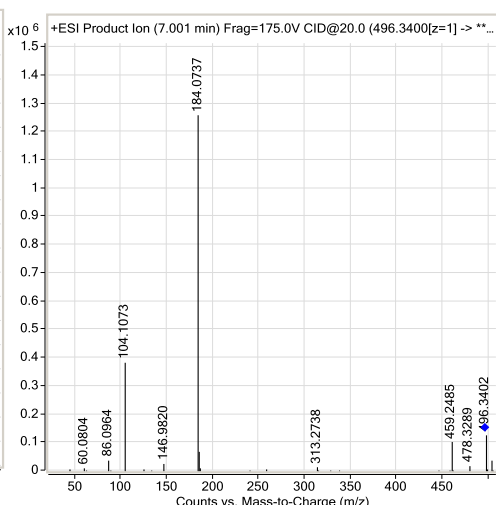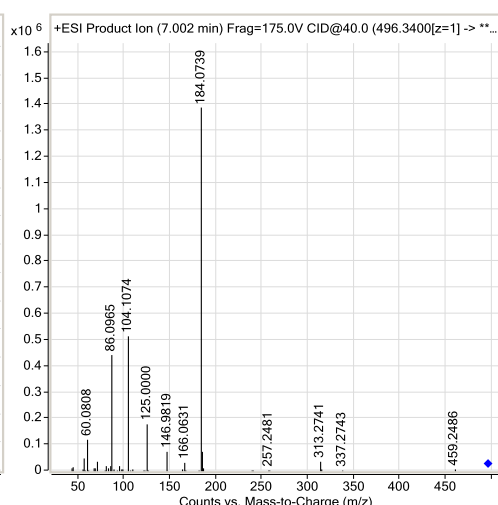

## LysoPC(P-16:0)

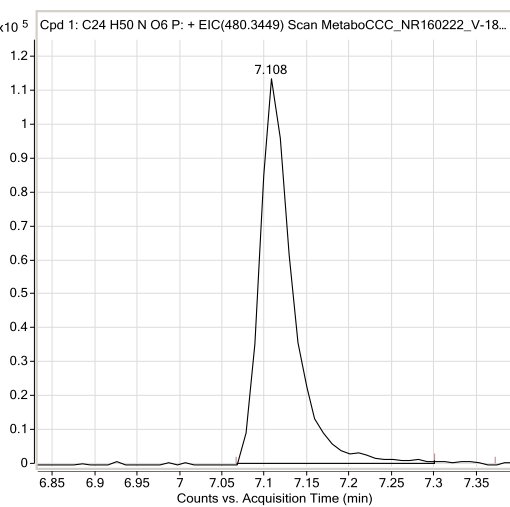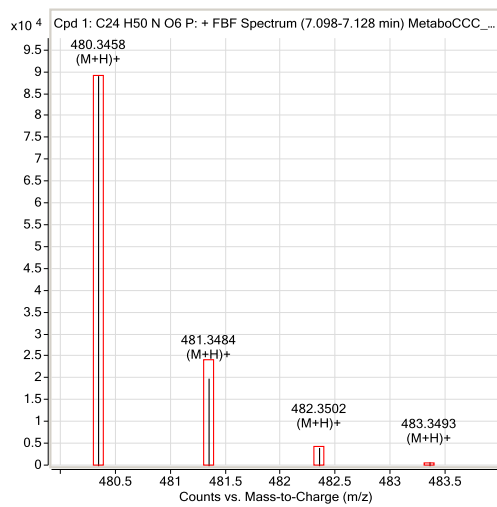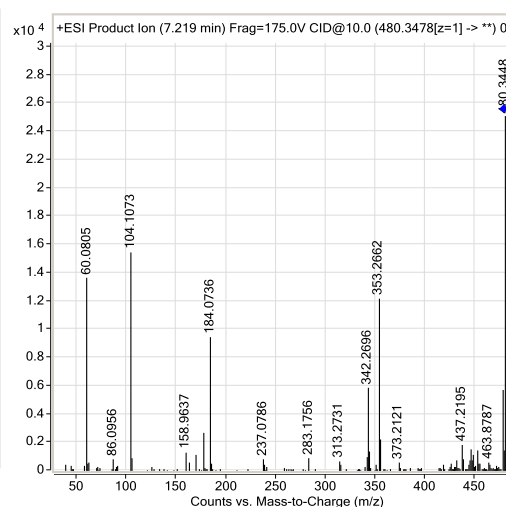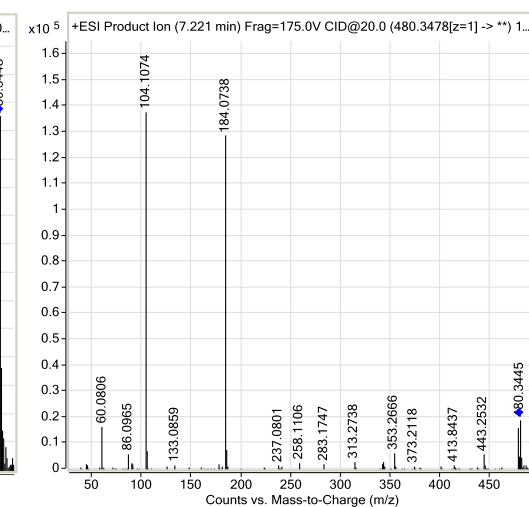



## LysoPC(17:0)

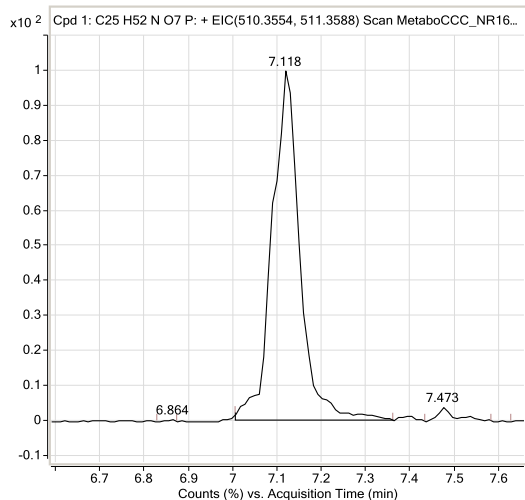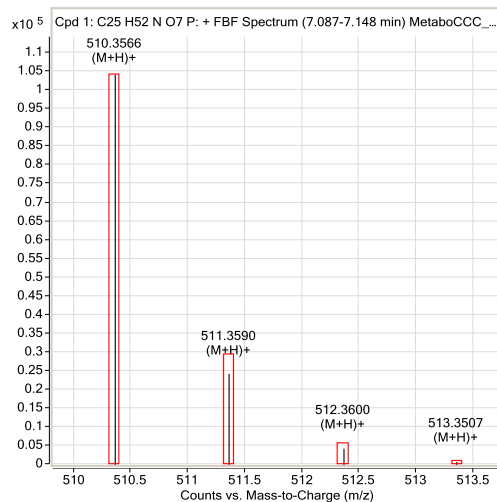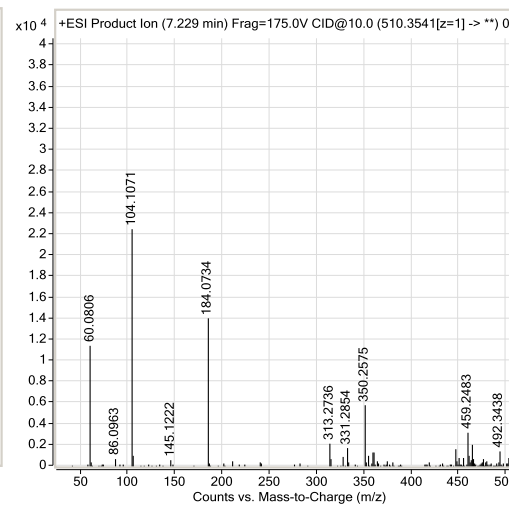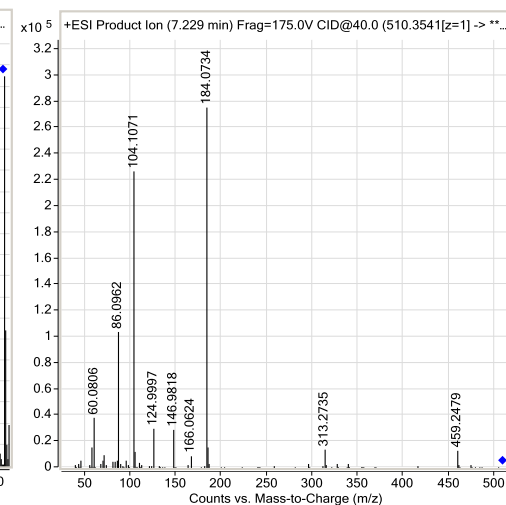

## LysoPC(18:0)

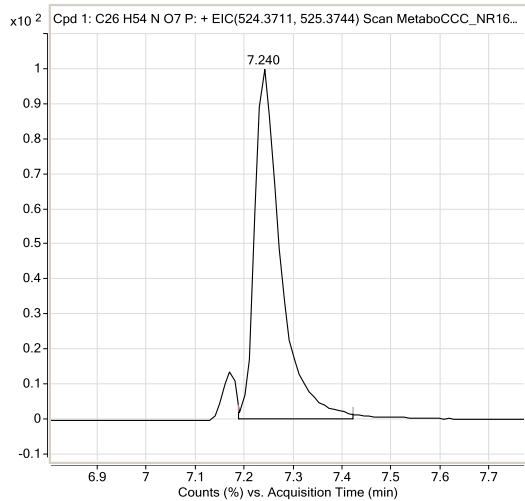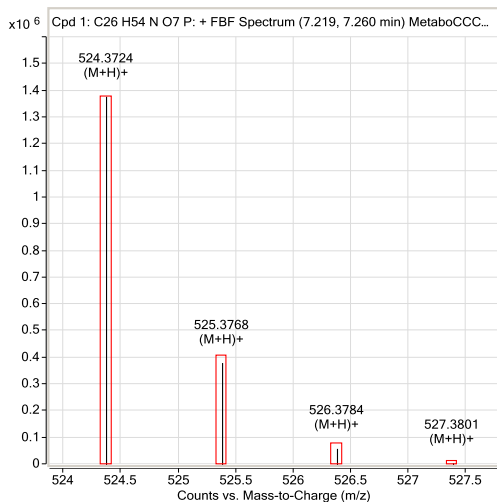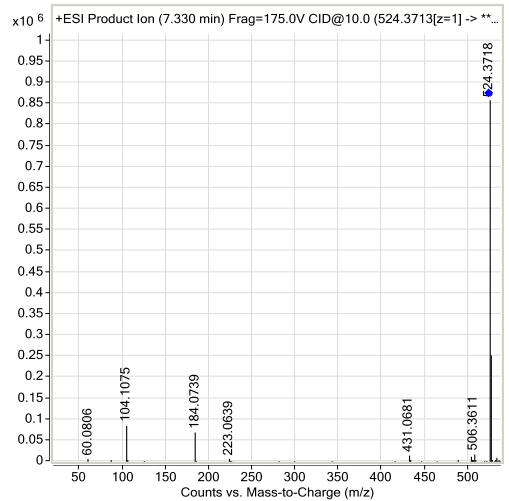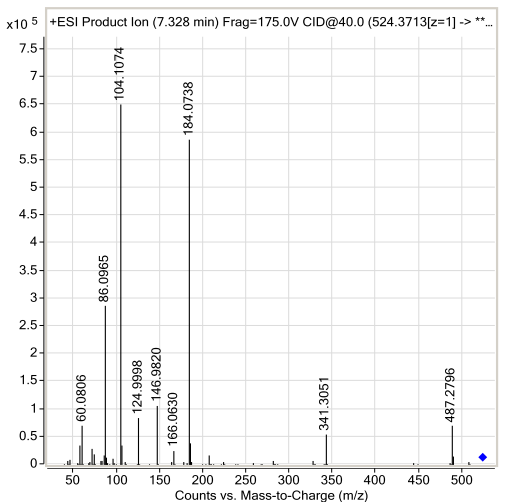

## Bilirubin

Bilirubin typically exhibits high number of ions in electrospray (see isotope patterns below). MS/MS was acquired from  $[M+H]^+$

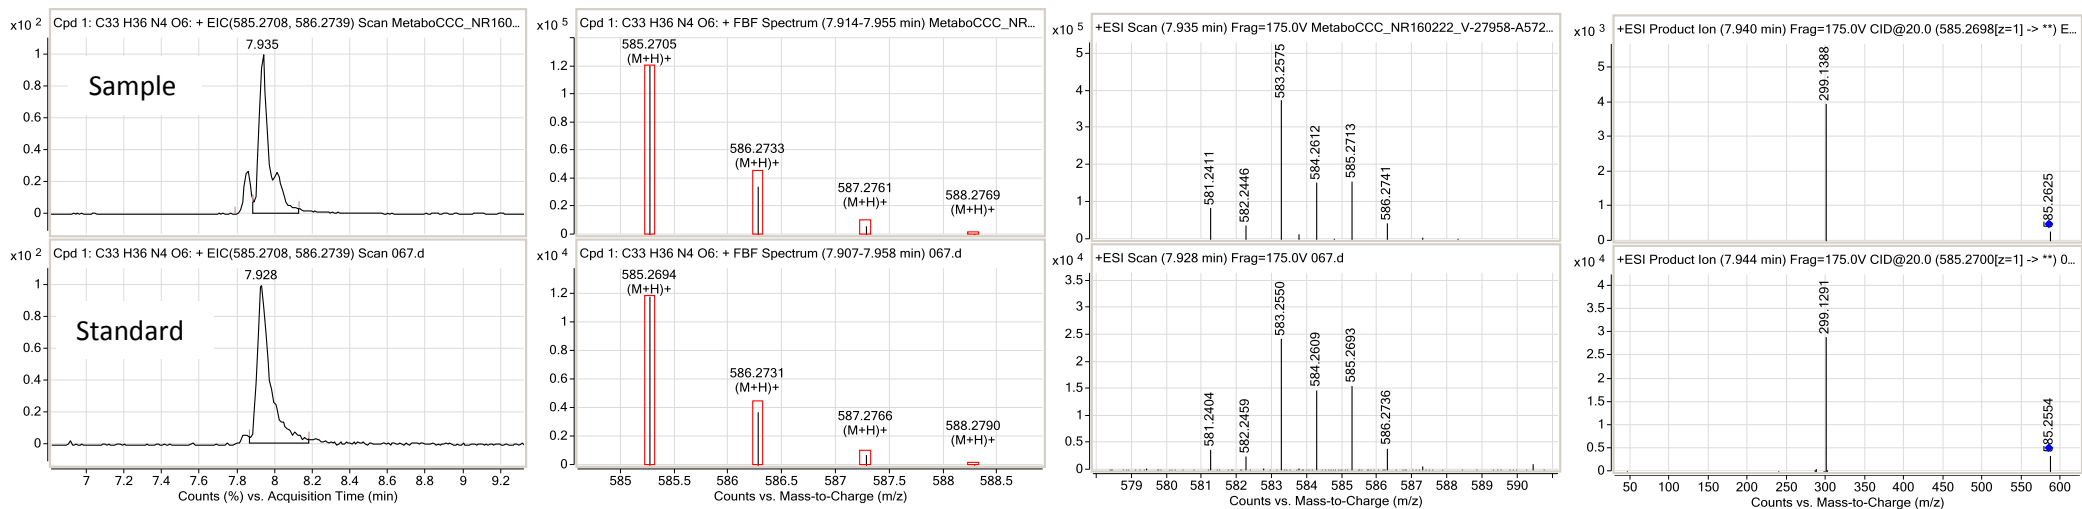

Supplement: IJC-145-1221-s001.pdf [file IJC-145-1221-s001.pdf]
