# Supplementary material
Source: PubMed Central journal article supplement (PMC6766970)
Supplement: IJC-145-1221-s004.pdf [file IJC-145-1221-s004.pdf]

**Supplementary Figure S1. Workflow and study design.** (A) The study population consisted of 268 colorectal cancer patients and 353 controls (individuals not diagnosed with any colorectal malignancy), including an independent discovery (ColoCare Study: n=180 patients/n=153 controls) and replication set (CORSA Study: n=88 patients/n=200 controls). (B) Study workflow including feature finding and data alignment (raw data processing), data processing, data analysis (discovery-replication setting) and identification of replicated features.

A

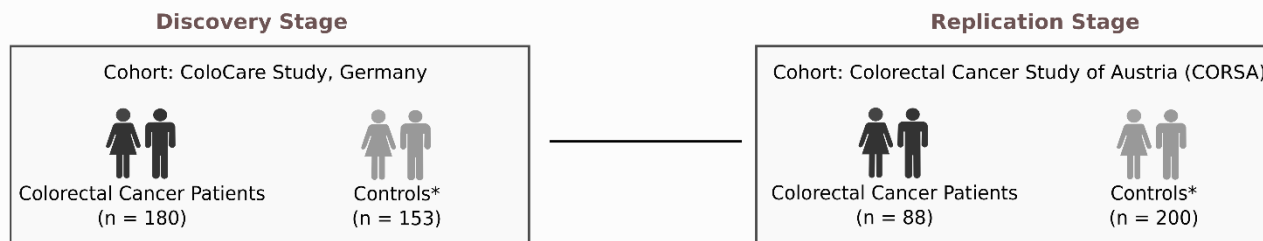

B

### 1. Feature finding & Data alignment

- Sample analysis** UHPLC-ESI-qTOF-MS analysis
- Feature finding** Qualitative Analysis B.06.00, DA reprocessor, Mass Profiler Professional 12.1  
**Features n = 10,015**
- Data alignment** Mass Profiler Professional 12.1 software
- Intensity filter** Features with intensity values < 10,000 in all study samples have been removed.

### 2. Data processing

- Missings filter** Features with missing values in >50% of samples in either colorectal cancer patients or controls in both populations were removed.  
**Remaining Features n = 2,669**
- Blank adjustment** Features that had a minimum mean intensity below the mean intensity of blank samples were removed.  
**Remaining Features**  
n = 1,156 [Discovery set]  
n = 1,148 [Validation set]
- log-transformation**
- Imputation** No imputation for univariate analysis.

### 3. Discovery stage

- Univariate Analysis** Multiple logistic regression models adjusted for age, sex, BMI (continuous) and smoking status.  
**Significant Features n = 691 [p < 0.05, FDR-corrected]**

### 4. Replication stage

- Univariate Analysis** Multiple logistic regression models (one-sided testing) adjusted for age, sex, BMI (continuous) and smoking status.  
**Replicated Features n = 97**

### 5. Feature Identification

**Identified Metabolites n = 28**

\* Controls are defined as individuals not diagnosed with any colorectal malignancy.
